# Supplementary material for: Electron transport at the interface of organic semiconductors and hydroxyl-containing dielectrics
Source: Royal Society of Chemistry journal article supplement (doi:10.1039/c8tc01343h), 2018-01-01
Supplement: c8tc01343h1.pdf [file c8tc01343h1.pdf]

Electronic Supplementary Information (ESI) for:

**Electron transport at the interface of organic semiconductors  
and organic hydroxyl-containing dielectrics**

Huihong Jiang<sup>1</sup>, Zhuoting Huang<sup>1</sup>, Guobiao Xue<sup>1</sup>, Hongzheng Chen<sup>1</sup>, Hanying Li<sup>\*1</sup>

---

<sup>1</sup> MOE Key Laboratory of Macromolecule Synthesis and Functionalization, State Key Laboratory of Silicon Materials, Department of Polymer Science and Engineering, Zhejiang University, Hangzhou, 310027, P. R. China.

\* E-mail: hanying\_li@zju.edu.cn

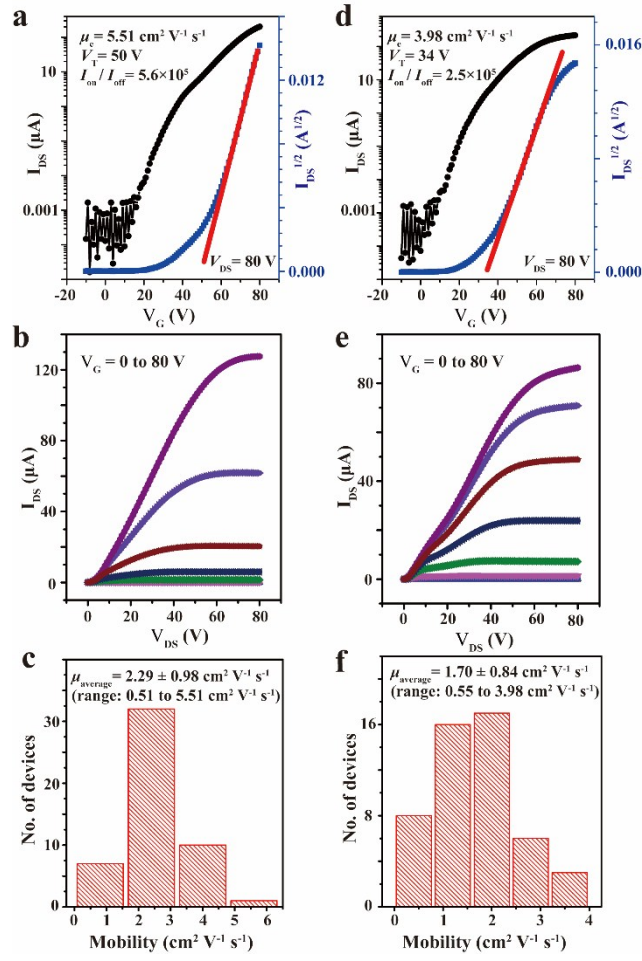

**Fig. S1** OFETs characteristics of  $C_{60}$  single crystals grown on BCB (a-c) and pristine  $SiO_2$  (d-f), respectively. (a, d) Typical transfer characteristics. (b, e) Typical output characteristics. (c, f) Histogram of electron mobility for 50 devices.

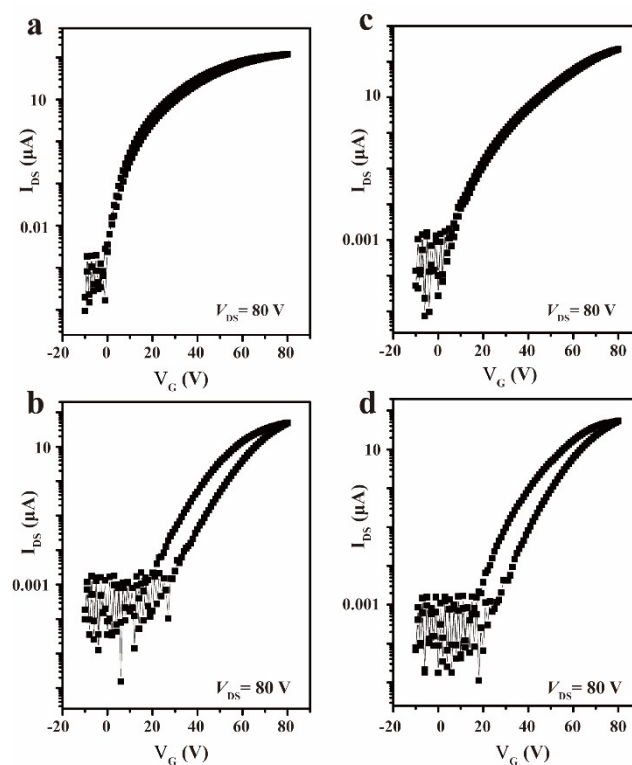

**Fig. S2** Transfer characteristics of  $C_{60}$  single crystals grown on PVA-80% (a), PVP (b), BCB (c) and  $SiO_2$  (d).

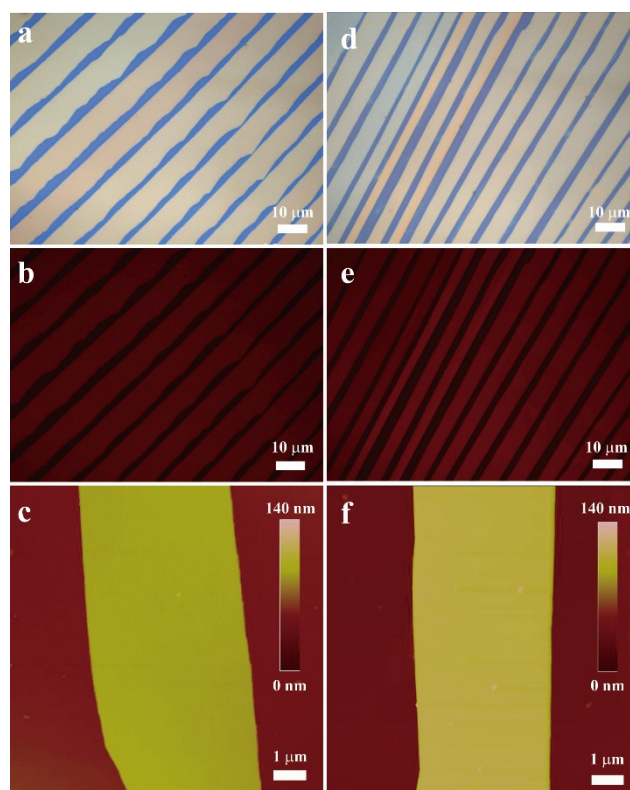

**Fig. S3** Morphology of TIPS-pentacene single crystals grown on PVP (a-c) and PVA-80% (d-f), respectively: (a, d) OM images of the crystals; (b, e) OM images of the crystals between

crossed-polarizers; (c, f) AFM images of the crystals.

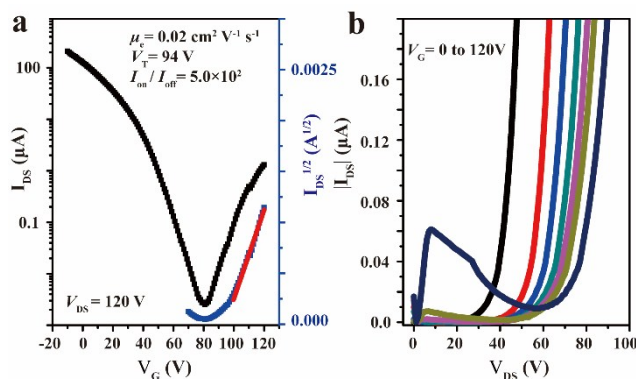

**Fig. S4** OFETs characteristics of TIPS-pentacene single crystals grown on PVP, using Au as electrodes. (a) Typical transfer characteristics of the OFETs in n-channel operation mode. (b) Typical output characteristics of the OFETs in n-channel operation mode.

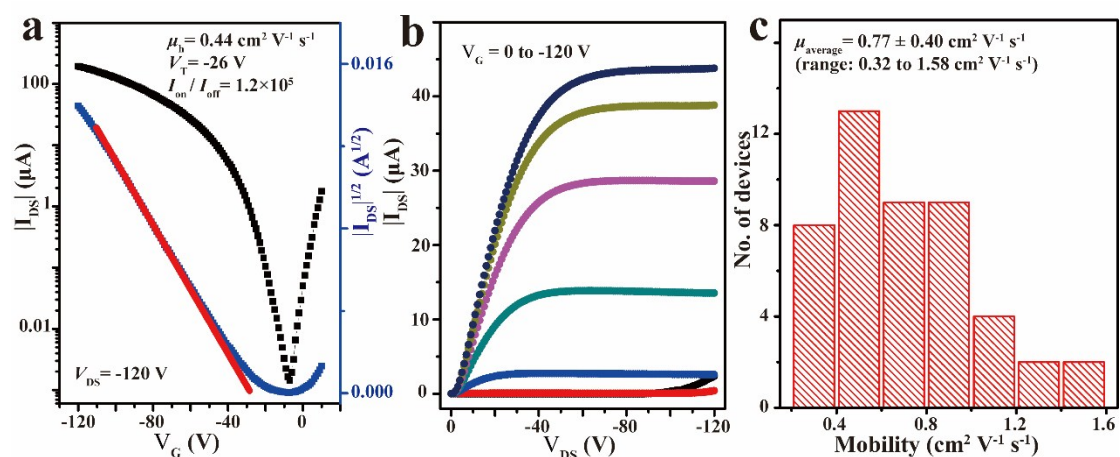

**Fig. S5** OFETs characteristics of TIPS-pentacene single crystals grown on PVP, using Ag as electrodes. (a) Typical transfer characteristics of the FETs in p-channel operation mode. (b) Typical output characteristics of the FETs in p-channel operation mode. (c) Histogram of hole mobility of 50 devices.

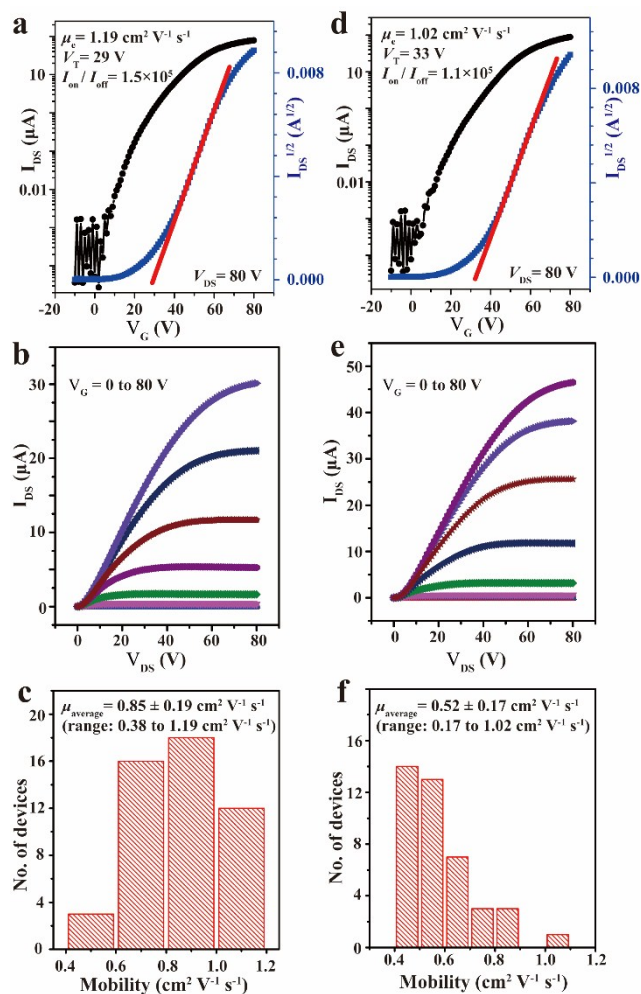

**Fig. S6** OFETs characteristics of  $C_{60}$  single crystals grown on PVA-87~89% (a-c) and PVA-99% (d-f), respectively. (a, d) Typical transfer characteristics. (b, e) Typical output characteristics. (c, f) Histogram of electron mobility for 50 devices.

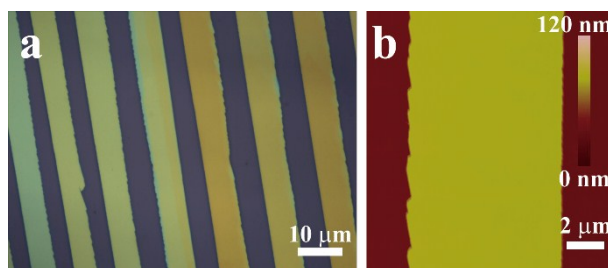

**Fig. S7** Morphology of  $C_{60}$  single crystals grown on PVA-80% after exposing in the atmosphere with ~40% humidity for 24 h. (a) An OM image of the crystals. (b) An AFM image of the crystal.

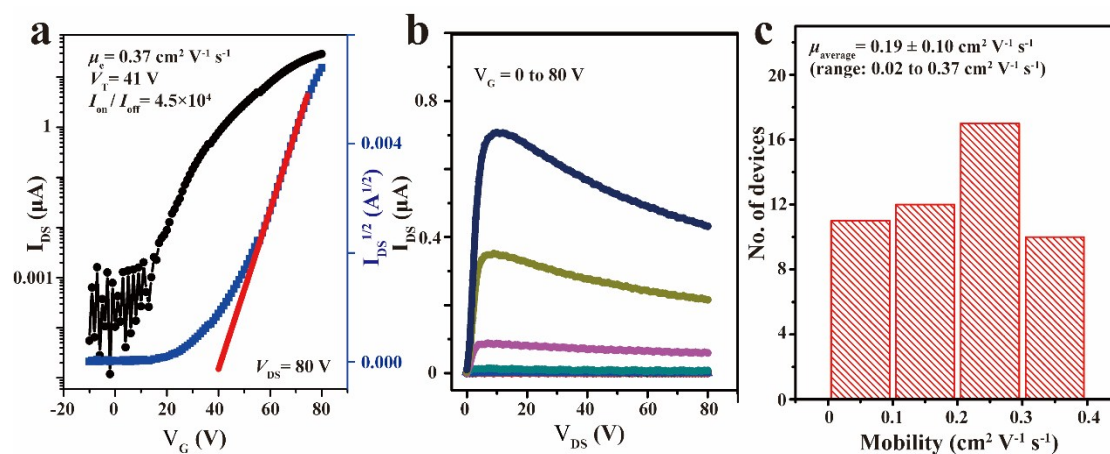

**Fig. S8** OFETs characteristics of  $\text{C}_{60}$  single crystals devices fabricated in air on  $\text{SiO}_2$  dielectric. (a) Typical transfer characteristics. (b) Typical output characteristics. (c) Histogram of electron mobility for 50 devices.
